# Supplementary material
Source: PubMed Central journal article supplement (PMC3340139)
Supplement: supp_M112.350066_jbc.M112.350066-1.pdf [file supp_M112.350066_jbc.M112.350066-1.pdf]

## SUPPORTING INFORMATION

### **Activation of NKT Cells Promote M2 Macrophage Polarization in Adipose Tissue and Improves Systemic Glucose Tolerance via the IL-4/STAT6 signaling axis in Obesity**

Yewei Ji<sup>1</sup>, Shengyi Sun<sup>2</sup>, Aimin Xu<sup>3</sup>, Prerna Bhargava<sup>4</sup>, Liu Yang<sup>2</sup>, Karen S. L. Lam<sup>3</sup>, Bin Gao<sup>5</sup>, Chih-Hao Lee<sup>4</sup>, Sander Kersten<sup>1,6</sup>, and Ling Qi<sup>1,2,\*</sup>

This supplementary information contains 7 figures and 1 table.

**SUPPLEMENTARY FIGURES:**

**Fig. S1. (A-B)** The diagrams illustrate our methods to gate NKT (A) and CD8<sup>+</sup> T cells (B) in various tissue of 6w-old B6 mice on LFD. Proper controls are included in each cell types. (C) Fatty acid compositions of diets used in this study provided by the suppliers.

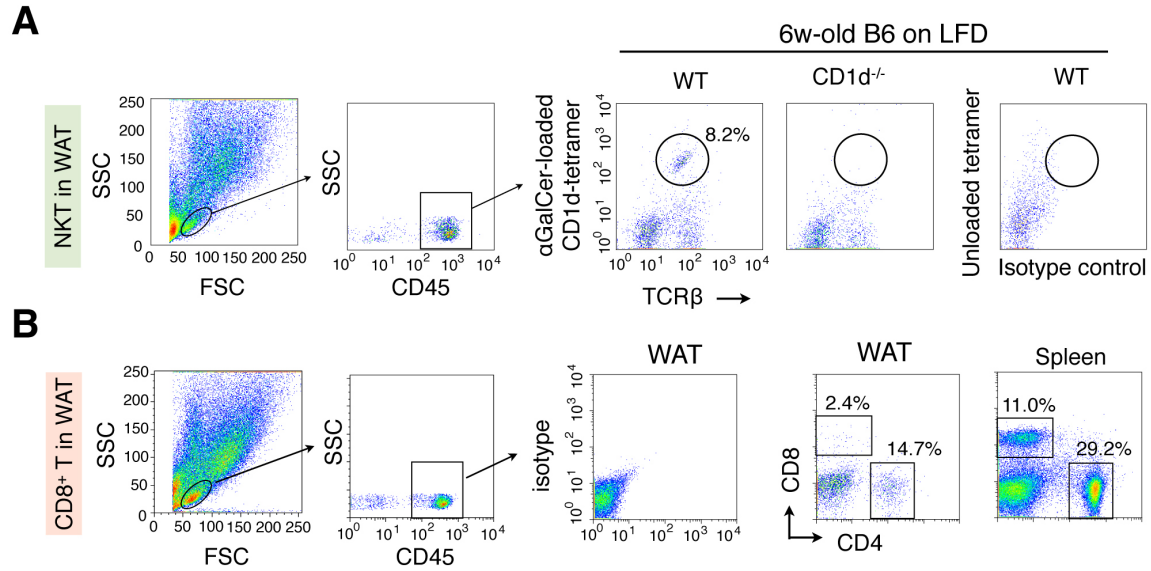

**C**

| Dietary fatty acid composition (mg/g diet) | 13% LFD (Teklad 2914) | 60% HFD (Bio-Serv, F3282) |
|--------------------------------------------|-----------------------|---------------------------|
| Myristic (C14:0)                           | -                     | 5                         |
| Palmitic (C16:0)                           | 5                     | 85                        |
| Palmitoleic (C16:1n7)                      | -                     | 10                        |
| Stearic (C18:0)                            | 1                     | 48                        |
| Oleic (C18:1n9)                            | 7                     | 148                       |
| Linoleic (C18:2n6)                         | 20                    | 37                        |
| Linolenic (C18:3n3)                        | 1                     | 4                         |
| <b>Calorie of fat</b>                      | <b>13%</b>            | <b>59%</b>                |
| <b>Calorie of protein</b>                  | <b>20%</b>            | <b>15%</b>                |
| <b>Calorie of CHO</b>                      | <b>67%</b>            | <b>26%</b>                |

**Fig. S2. Diagram of germline loci of human *TCR* genes.** Sizes of exons and introns not shown to scale. The  $\alpha$  chain gene cluster contains  $\sim 50$  variable (V) segments,  $\sim 70$  joining (J) segments, and a single constant (C) segment. The  $\beta$  chain gene cluster consists of 75 V segments and two sets of D, J and C segments. Human type 1 NKT cells express invariant TCR containing Va24 segment. Positions of three oligo sets used in **Fig. 2** are indicated. The distance between the forward (F) and reverse (R) primers of each primer set are indicated next to the R primer with the size of Q-PCR products shown in parentheses. Sequences for each primer is listed in **Table S1**.

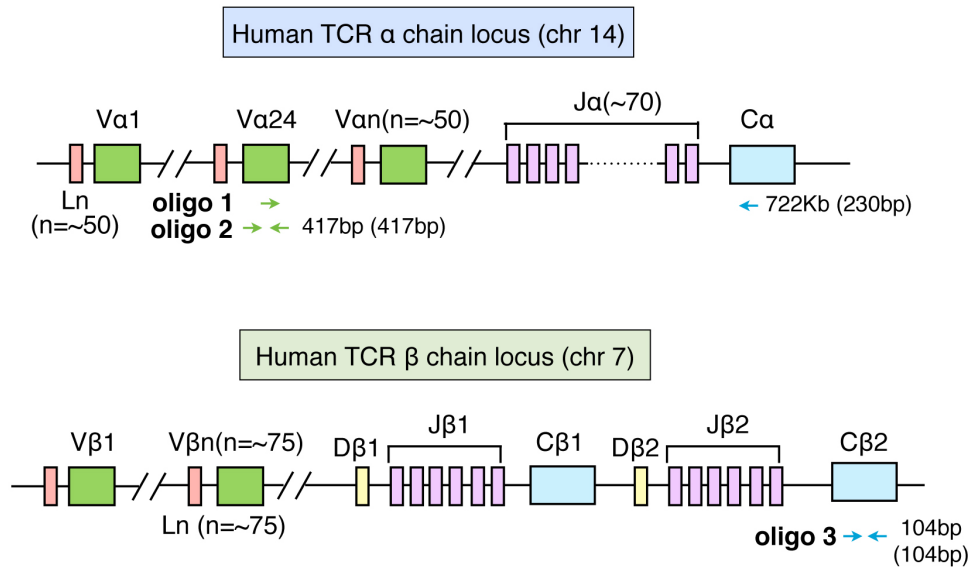

**Fig. S3.** GTT (A) of WT and CD1d<sup>-/-</sup> mice on 8-week HFD. n=8-9 mice each, 2 repeats. (B-D) Body and epididymal fat weights of mice under LFD or HFD with vehicle (veh) or  $\alpha$ GalCer injection. Values represent mean  $\pm$  s.e.m. \*,  $P < 0.05$ , \*\*,  $P < 0.01$ , \*\*\*,  $P < 0.005$ .

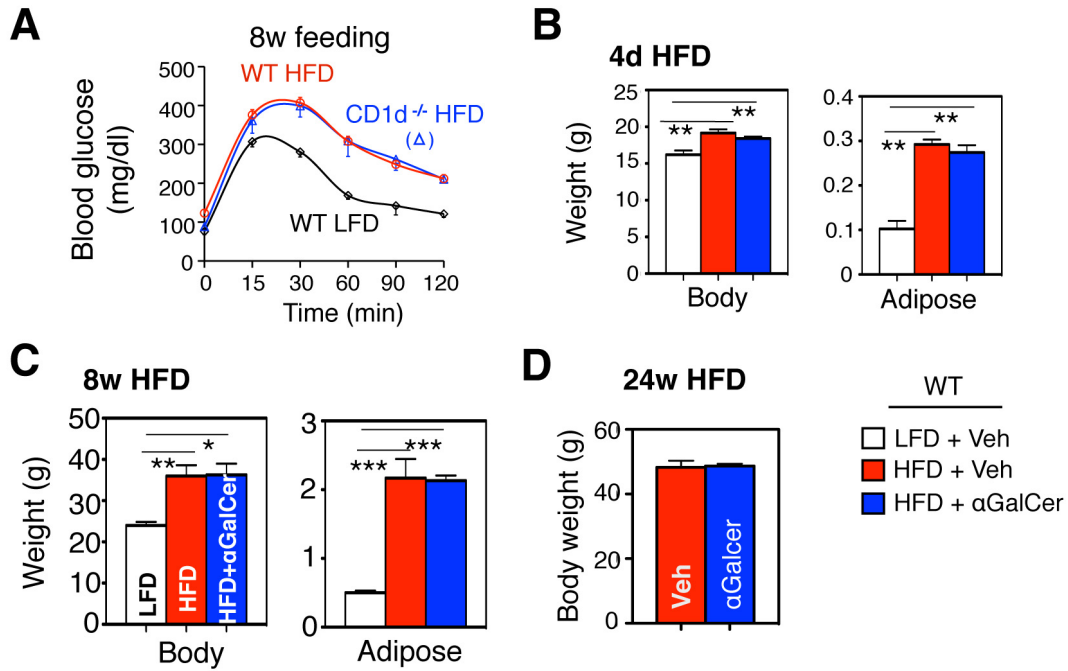

**Fig. S4. (A-B)** Quantitation of cell numbers per g adipose tissue of total CD45<sup>+</sup> lymphocytes, NKT cells, F4/80<sup>+</sup> CD11b<sup>+</sup> macrophages and CD8<sup>+</sup> T cells of mice that have been on LFD or 4d HFD (**A**) or 8w HFD (**B**) with vehicle or  $\alpha$ GalCer challenge. N=4 mice each. (**C**) Flow analysis of NKT cells in adipose tissue of 14w-old mice that have been on HFD for 24w injected with  $\alpha$ GalCer or vehicle (veh). Number refers to the percentage of NKT cells in total CD45<sup>+</sup> lymphocytes in SVC of adipose tissue. N=3-4 mice per cohort. Values represent mean  $\pm$  s.e.m.\*,  $P<0.05$ , \*\*,  $P<0.01$ , and \*\*\*,  $P<0.005$ .

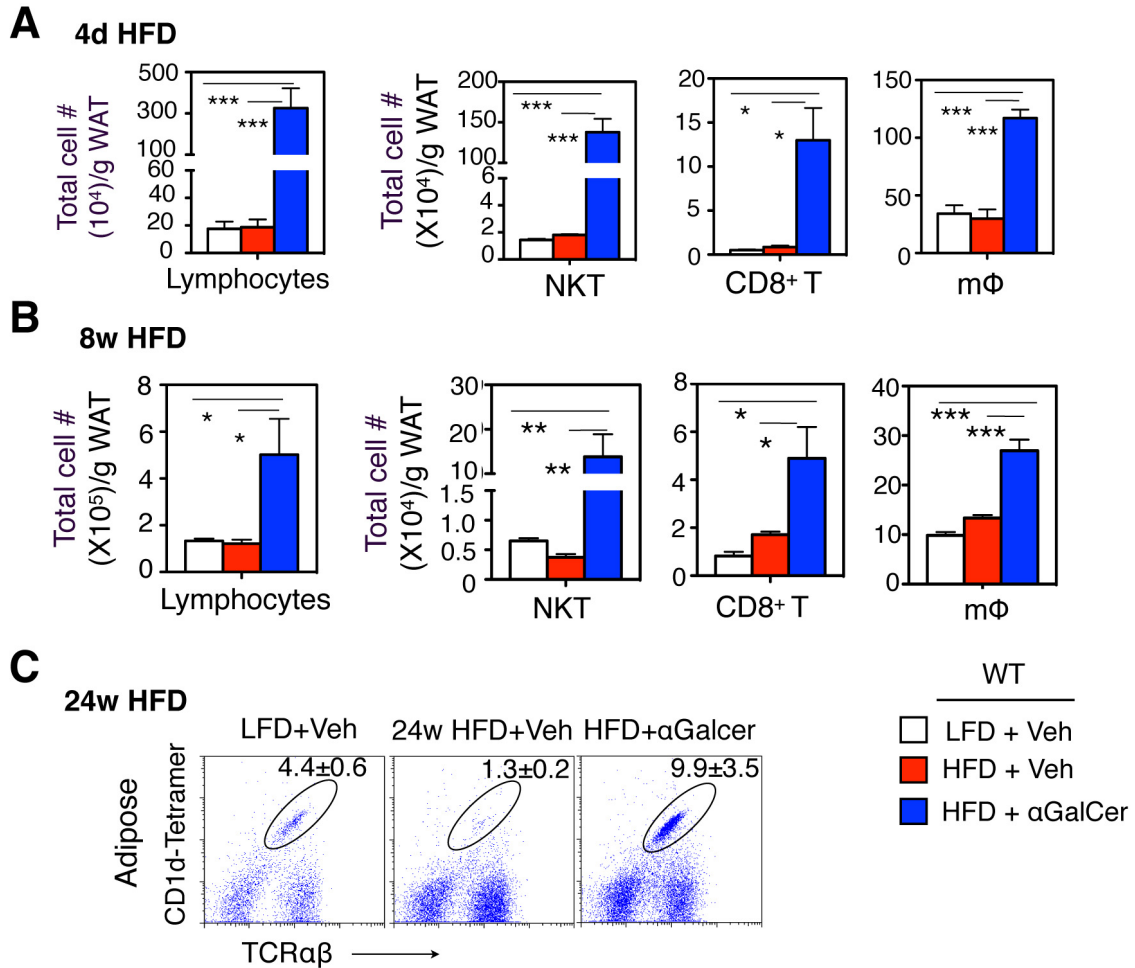

**Fig. S5. (A)** Q-PCR analysis of adipose tissue of 30w-old mice that have been on HFD for 24w were injected with  $\alpha$ GalCer or vehicle (veh). N=3-4 mice per cohort. **(B)** Western blot analysis of Arg1 expression in the liver of various cohorts under 4d (upper) or 8w (lower) HFD feeding. n=4-5 mice each, 2 repeats. HSP90, a loading control.

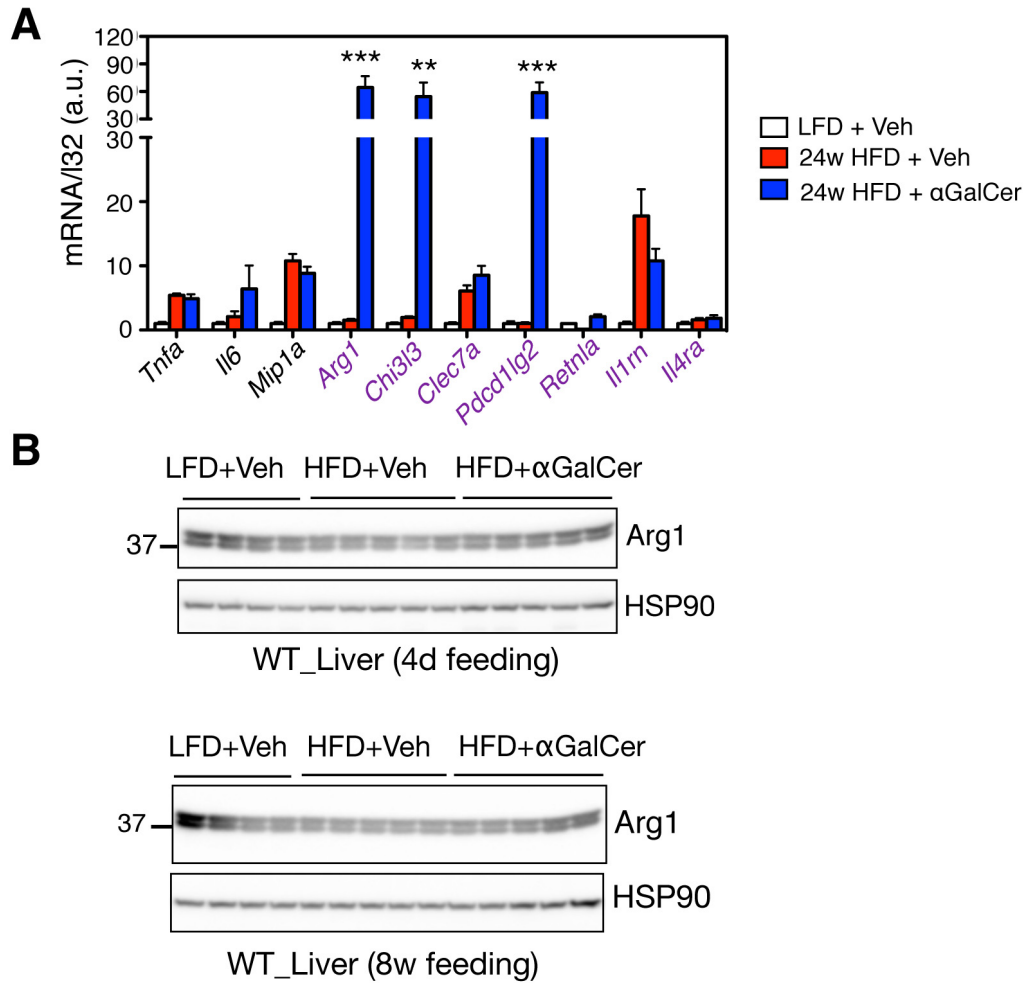

**Fig. S6. (A)** Hierarchical clustering of microarray data of individual mice depicted as dendrogram showing clear separation of WT mice injected with  $\alpha$ GalCer from the other groups. **(B)** Normalized enrichment score (NES) showing the most significant upregulated pathways identified by GSEA (all with false discovery rate q-value < 0.0003) in WT mice injected with  $\alpha$ GalCer. “ $T_H1/T_H2$  differentiation” and “IL-4 pathway” highlighted in red. **(C)** Diagram of the canonical IL-4 pathway illustrating the fold induction of each key component by  $\alpha$ GalCer in WAT. Color scale shown at the bottom. Note that STAT6 is activated by phosphorylation, not at the transcriptional level.

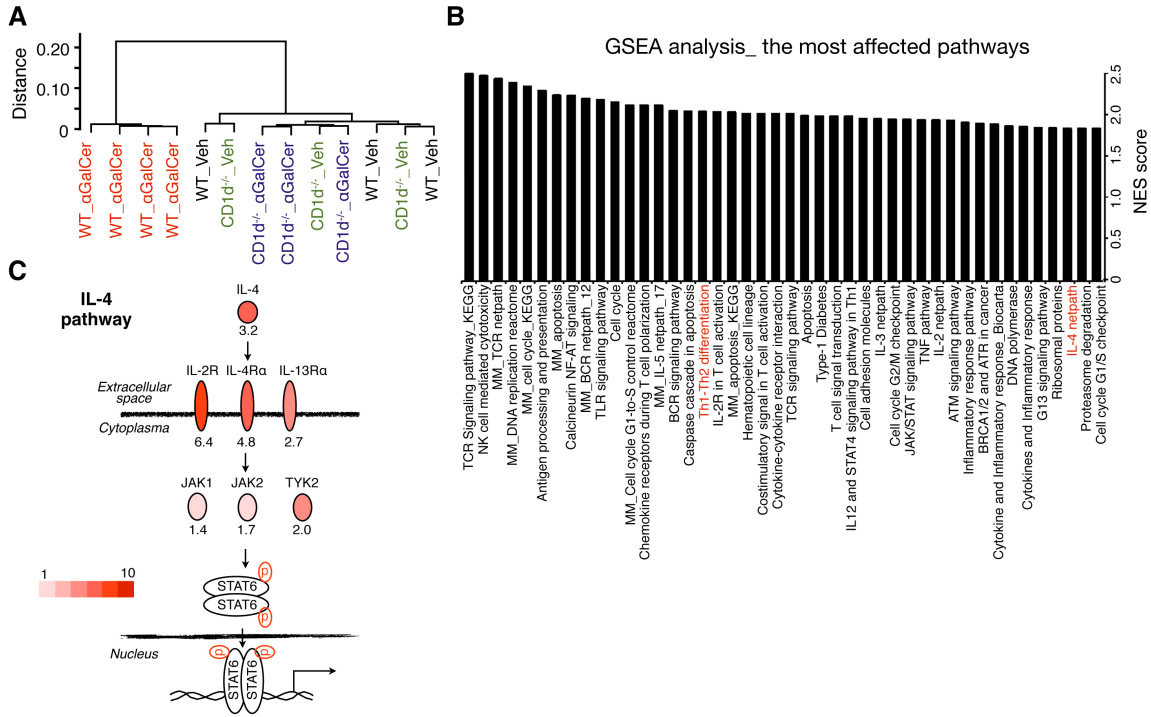

**Fig. S7. (A)** H&E section of adipose tissue of 4d HFD mice with veh or  $\alpha$ GalCer injection (n=4-5 mice). **(B)** Total number of lymphocytes in adipose tissue of WT or IL-4<sup>-/-</sup> mice on 4d HFD with or without  $\alpha$ GalCer challenge. N=5-6 mice each, 2 repeats. **(C)** Q-PCR analysis of M1 (black) and M2 genes (purple) in WAT of WT, PPAR $\gamma$ <sup>-/-</sup> (lower), PPAR $\delta$ <sup>-/-</sup> (upper) mice following 4 day HFD feeding with or without  $\alpha$ GalCer injection. Data normalized to “WT+vehicle” whose value was set at 1. Values represent mean  $\pm$  s.e.m. \*\*,  $P < 0.01$ , and \*\*\*,  $P < 0.005$ .

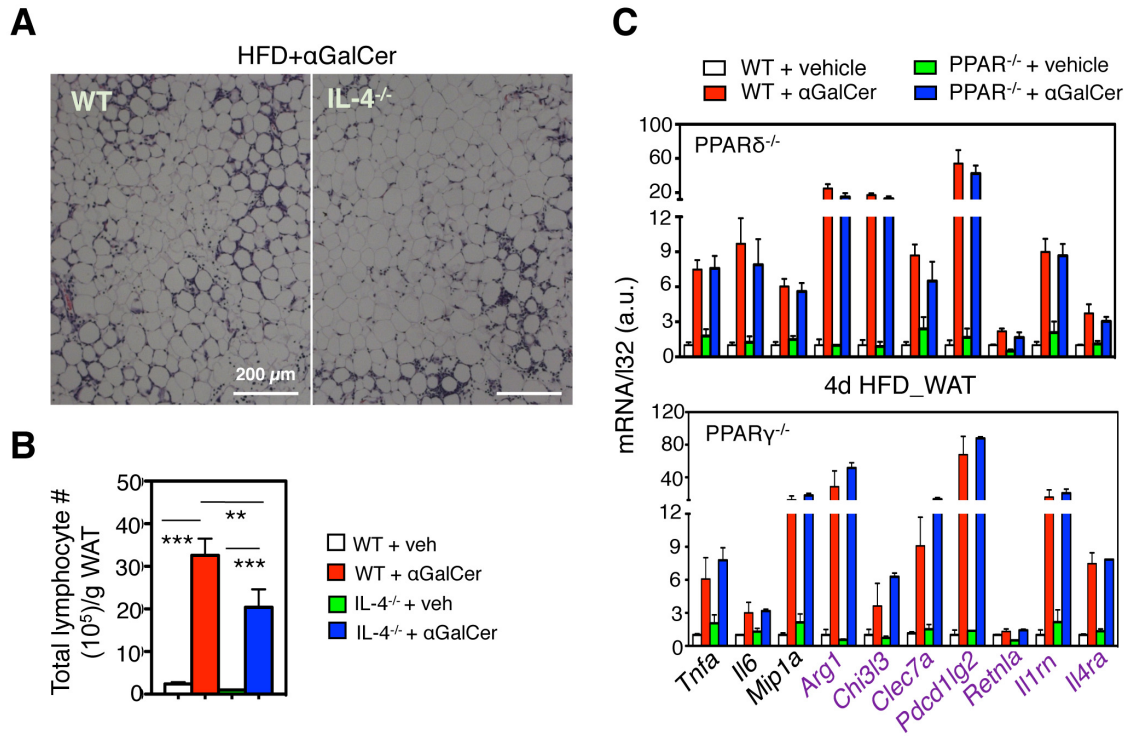



**Table S1.** Q- and RT-PCR primers used in this study.

| <b>Inflammatory gene analysis (mouse)</b>                                                         |                         |                         |
|---------------------------------------------------------------------------------------------------|-------------------------|-------------------------|
| <b>Target genes</b>                                                                               | <b>Sequence F</b>       | <b>Sequence R</b>       |
| TNF- $\alpha$ ( <i>Tnfa</i> )                                                                     | TCAGCCGATTTGCTATCTCATA  | AGTACTTGGGCAGATTGACCTC  |
| Interleukin 4 ( <i>Il4</i> )                                                                      | CATGGGAAAACCTCCATGCTT   | TGGACTCATTTCATGGTGCAG   |
| Interleukin 6 ( <i>Il6</i> )                                                                      | AGACAAAGCCAGAGTCCTTCAG  | TGCCGAGTAGATCTCAAAGTGA  |
| MIP-1 $\alpha$ ( <i>Mip1a</i> )                                                                   | TTCTCTGTACCATGACACTCTGC | CGTGGAATCTTCCGGCTGTAG   |
| Arginase 1 ( <i>Arg1</i> )                                                                        | CTCCAAGCCAAAGTCCTTAGAG  | AGGAGCTGTCATTAGGGACATC  |
| chitinase 3-like 3 ( <i>Chi3l3</i> )                                                              | GGCTCAAGGACAACAATTTAGG  | ACTGTGGAAAACCGTTGAACT   |
| C-type lectin domain family 7, member a ( <i>Clec7a</i> )                                         | TCATTGAAAGCCAAACATCG    | CCTGGGGAGCTGTATTTCTG    |
| Programmed cell death 1 ligand 2 ( <i>Pdc1lg2</i> )                                               | ACGTGGCCACTTCATGTTTT    | TCTTGAGGGTTTCCCATCAG    |
| Resistin like alpha ( <i>Retnla</i> )                                                             | TATGAACAGATGGGCCTCCT    | AGCTGGGTTCTCCACCTCTT    |
| Interleukin 1 receptor antagonist ( <i>Il1rn</i> )                                                | TTGTGCCAAGTCTGGAGATG    | TTCTCAGAGCGGATGAAGGT    |
| Interleukin receptor 4 alpha ( <i>Il4ra</i> )                                                     | GAAGCCAGGAGTCAACCAAG    | ATACAGCGCACCACACTGAC    |
| <b>NKT TCR analysis (Human)</b>                                                                   |                         |                         |
| <b>Oligo 1:</b> TRAV10 (T cell receptor alpha variable 10 or V $\alpha$ 24) – TRAC (TCR constant) | GATATACAGCAACTCTGGATGCA | GGCAGACAGACTTGTCACTGGAT |
| <b>Oligo 2:</b> TRAV10 (T cell receptor alpha variable 10 or V $\alpha$ 24)                       | AAGCATCTGACGACCTTCTTG   | AACAGGACCTCTCCAGTATC    |
| <b>Oligo 3:</b> TRBC2 (T cell receptor beta constant 2)                                           | CAGCGAGCCCTACTCAAATTAG  | GACCTGTGGAAGAGAGAACATT  |
| 18S                                                                                               | AGTCCCTGCCCTTTGTACACA   | CGATCCGAGGGCCTCACTA     |
